# Supplementary material for: Testosterone regulation of sex steroid-related mRNAs and dopamine-related mRNAs in adolescent male rat substantia nigra
Source: PubMed Central journal article supplement (PMC3467168; doi:10.1186/1471-2202-13-95), 2012-08-06
Supplement: 1471-2202-13-95-S1.pdf [file 1471-2202-13-95-S1.pdf]

A

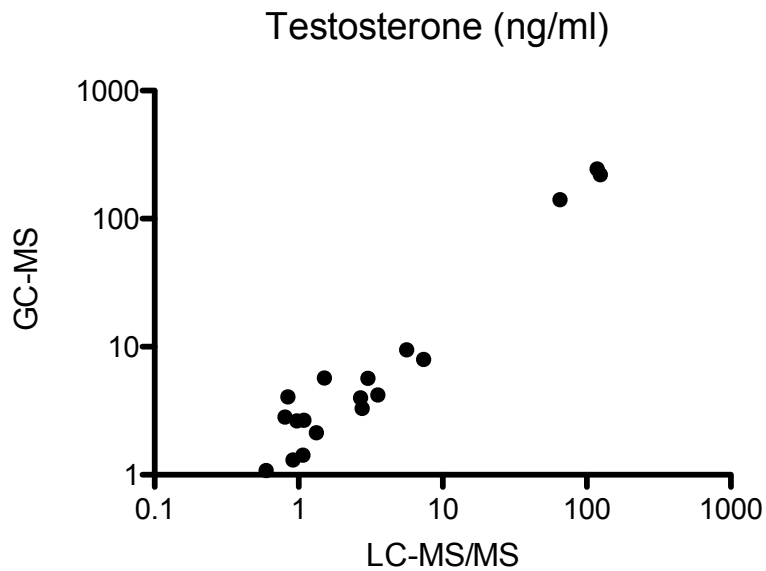

B

|                | <b>Testosterone</b> | <b>DHT</b> |
|----------------|---------------------|------------|
|                | ng/ml (n)           | ng/ml (n)  |
| <b>Intact</b>  | 4.70 (10)           | nd (10)    |
| <b>Gdx</b>     | 1.00 (6)            | nd (7)     |
| <b>Gdx+T</b>   | 20.6 (8)            | 0.10 (8)   |
| <b>Gdx+DHT</b> | 1.70 (7)            | 68.0 (6)   |

Figure 1: Comparison of testosterone measured in sera by GC-MS or LC-MS/MS.

(A). Correlation of circulating testosterone in rat sera from Intact and Gdx+T groups ( $P < 0.0001$ ,  $r = 0.86$ )

(B). Average circulating testosterone and DHT in sera quantified by GC-MS. nd = not detected.
